# Supplementary material for: Interleukin-6 mediated exercise-induced alleviation of adiposity and hepatic steatosis in mice
Source: HighWire-hosted journal article supplement (doi:10.1136/bmjdrc-2020-001431), 2021-04-01
Supplement: bmjdrc-2020-001431supp001_data_supplement.pdf [file bmjdrc-2020-001431supp001_data_supplement.pdf]

## Supplementary Material

## Supplementary Figure 1

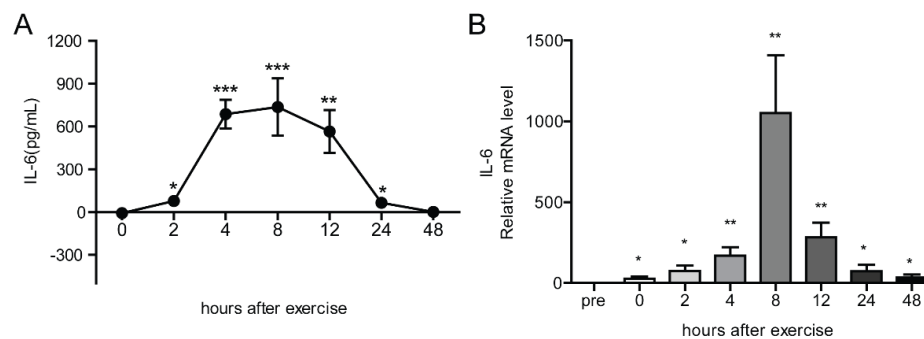

**Supplementary Figure 1. Effect of a single exercise training on IL-6 expression.** (A) Plasma IL-6 concentrations and (B) muscle IL-6 mRNA expression in C57BL/6 mice after a single exercise training. Data represent the mean  $\pm$  SEM. \*  $P < 0.05$  compared with the control group, \*\*  $P < 0.01$  compared with the control group, \*\*\*  $P < 0.001$  compared with the control group

## Supplementary Figure 2

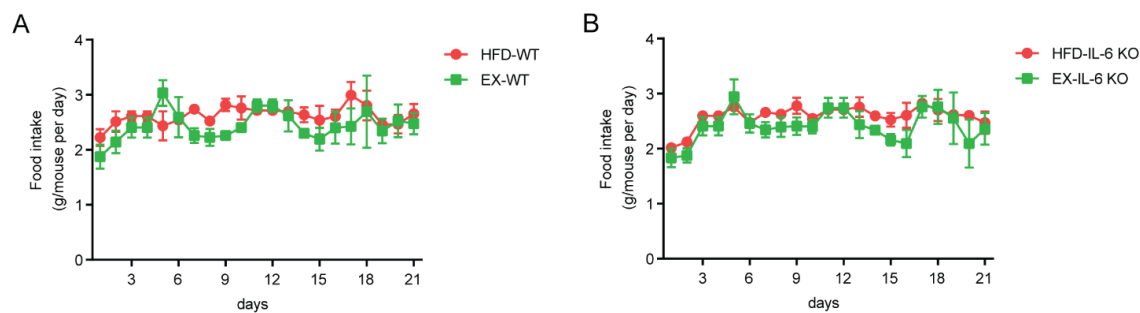

**Supplementary Figure 2. Effect of exercise training on food intake.** Food intake per mouse in HFD group and EX group of WT mice (A) and IL-6<sup>-/-</sup> mice (B). Data represent the mean  $\pm$  SEM, n = 6-8 in each group.

## Supplementary Figure 3

## Supplementary Material

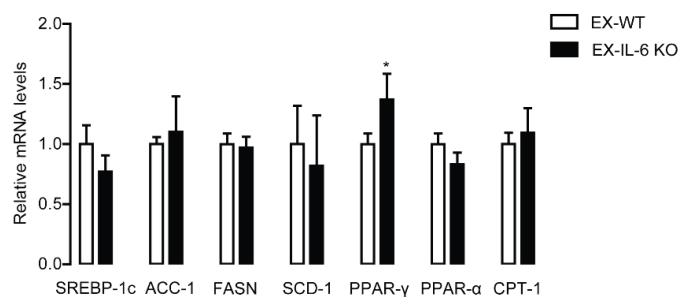

**Supplementary Figure 3. The expression of lipogenic genes in liver samples after HFD feeding and exercise training.** Hepatic mRNA levels of SREBP-1c, ACC-1, FASN, SCD-1, PPAR- $\gamma$ , PPAR- $\alpha$  and CPT-1 analyzed by Real-time PCR. Data represent the mean  $\pm$  SEM, n = 6-8 in each group. \* P < 0.05.

## Supplementary Figure 4

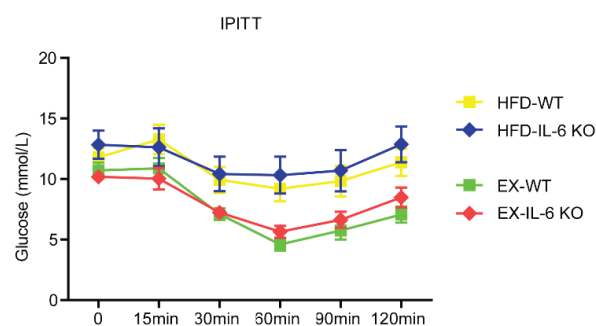

**Supplementary Figure 4. Effect of exercise training on HFD-induced insulin resistance.** Intraperitoneal insulin tolerance test (IPITT) in HFD group and EX group of WT mice and IL-6<sup>-/-</sup> mice. Data represent the mean  $\pm$  SEM, n = 6-8 in each group.
